# Supplementary material for: Diet and ambient temperature interact to shape plasma fatty acid composition, basal metabolic rate, and oxidative stress in great tits
Source: Oxford University Press journal article supplement (doi:10.1242/jeb.186759), 2018-01-01
Supplement: jeb186759supp.pdf [file jeb186759supp.pdf]

**Table S1.** Concentrations of individual fatty acids and fatty acid groups in all plasma samples of the experiment. Table presents raw data.

**Table S2.** Relative levels (percent of total fatty acid content) of individual fatty acids and fatty acid groups in all plasma samples of the experiment. Table presents raw data.

**Table S3.** Basal metabolic rate (BMR), respiratory quotient, and body mass of the birds included in the BMR measurements. Table presents raw data.

[Click here to Download Tables S1 - S3](#)
